# Supplementary material
Source: publisher site journal article supplement (https://www.dovepress.com/article/586366)
Supplement: Supplementary file 1 [file 586366%20Supplementary%20Tables.docx]

Supplementary table 1 Definitions of Patient Groups and Psoriasis Diagnosis

| Group | Definition |
| --- | --- |
| Psoriasis diagnosis | Psoriasis vulgaris diagnosed by a dermatologist based on characteristic clinical manifestations (e.g., well-demarcated erythematous plaques with silvery scales); no requirement for biopsy confirmation |
| High-risk PsA | Psoriasis patients with PEST score ≥1, who do not meet the CASPAR criteria, have no clinical symptoms or signs of psoriatic arthritis (based on rheumatologic examination), and show no pathological findings on musculoskeletal ultrasound (MSUS) |
| Subclinical PsA | Psoriasis patients with PEST score ≥1, who do not meet the CASPAR criteria, but present with either pathological MSUS findings (e.g., synovitis, enthesitis, tenosynovitis, or joint effusion) or clinical symptoms/signs suggestive of PsA (or both) |
| Clinical PsA | Psoriasis patients with PEST score ≥1, who meet the CASPAR criteria for psoriatic arthritis, have definite clinical symptoms and signs of PsA confirmed by rheumatologic examination, and may or may not have abnormal MSUS findings |

Supplementary table 2 Psoriasis Epidemiology Screening Tool

|  | Yes | No |
| --- | --- | --- |
| 1. Have you ever suffered from single or multiple joint swelling? |  |  |
| 2. Has the doctor ever told you that you have arthritis? |  |  |
| 3. Are there any holes or pits in your fingernails or toenails? |  |  |
| 4. Have you ever had any pain in your heel? |  |  |
| 5. Have you ever suffered from complete swelling and pain in your fingers or toes without finding an obvious cause? |  |  |

Supplementary table 3 Ultrasound examination of peripheral joints and tendons.

| Joints | 68 | Tendons | 54 | Entheses | 56 |
| --- | --- | --- | --- | --- | --- |
| Elbow | 2 | Extensor tendons | 2 | Extensor tendons | 2 |
|  |  | Flexor tendons | 2 | Flexor tendons | 2 |
|  |  | Triceps tendon | 2 | Triceps tendon | 2 |
| Wrist | 2 | Wrist extensor tendons | 2 | Wrist extensor tendons | 2 |
|  |  | Wrist flexor tendons | 2 | Wrist flexor tendons | 2 |
| Metacarpophalangeal joints (MCPs) | 10 | Extensor tendons | 10 | Distal phalanx extensor tendons | 10 |
| Proximal interphalangeal joints (PIPs) | 10 | Flexor tendons | 10 | Distal phalanx flexor tendons | 10 |
| Distal interphalangeal joints (DIPs） | 8 |  |  |  |  |
| Knee joint | 2 | Quadriceps tendon | 2 | Quadriceps tendon insertion into the patella | 2 |
|  |  | Patellar ligament | 2 | Patellar tendon insertion into the patella | 2 |
|  |  |  |  | Patellar tendon insertion into the tibial tuberosity | 2 |
| Ankle | 2 | Posterior tibial tendon | 2 | Posterior tibial tendon | 2 |
|  |  | Fibular longus tendon | 2 | Fibular longus tendon | 2 |
|  |  | Fibular brevis tendon | 2 | Fibular brevis tendon | 2 |
| Tarsal bones | 2 | Achilles tendon | 2 | Achilles tendon insertion into the calcaneus | 2 |
|  |  | Plantar fascia | 2 | Plantar fascia insertion at the calcaneus | 2 |
| Metatarsophalangeal joints (MIPs) | 10 | Extensor tendons | 10 | Extensor tendons of the distal phalanx | 10 |
| Proximal interphalangeal joints (PIPs) | 10 |  |  |  |  |
| Distal interphalangeal joints (DIPs) | 10 |  |  |  |  |

Supplementary table 4 Pathological Definitions (Based on OMERACT Criteria)

| Pathology | Definition |
| --- | --- |
| Synovitis | Hypoechoic synovial hypertrophy (with or without Doppler signal) within the joint capsule. Graded semi-quantitatively (0–3) for both grayscale and power Doppler signals. |
| Tenosynovitis | Hypoechoic or anechoic thickened tissue with or without fluid within the tendon sheath, with possible Doppler signal. Assessed in both longitudinal and transverse planes. |
| Enthesitis | Hypoechoic and/or thickened insertion of the tendon into the bone, with or without Doppler signal and/or bony changes (enthesophytes, erosions). Assessed in longitudinal plane. |
| Joint effusion | Abnormal anechoous or hypoechoic intra-articular material that is displaceable and compressible, without Doppler signal. |
| New bone erosion | Intra-articular discontinuity of the bone surface visible in two perpendicular planes. |

Supplementary table 5

| Section | Number | RECORD requirements | Position in the manuscript | Supplementary Explanation |
| --- | --- | --- | --- | --- |
| Title and Abstract | 1 | Indicate in the title or abstract that routine data collection (or administrative health data) was used. | Title: A Study on Early Screening and Disease Characteristics of Psoriatic Arthritis Based on PEST Questionnaire and Musculoskeletal Ultrasound  Abstract: Page 2-3 |  |
| Introduction | 2 | Explain the scientific background and principles. | 1. Introduction: Page 3-7 | The importance and existing challenges of early diagnosis of PsA have been clearly stated. |
| Method | 3 | Describe the research design. | 2. Patients and Methods: Page 7-11 | It has been designated as a 'retrospective study'. |
| Data sources and links | 4a | Describe the sources of personal level data used to create datasets (e.g. EMR, healthcare databases, survey questionnaires). | 2.1 Study design: Page 7-8 | It is clearly stated that the data comes from: questionnaires filled out by patients, hospital electronic medical records (EMR), and musculoskeletal ultrasound image databases. |
|  | 4b | If multiple data sources are linked, a detailed description of the linking method (deterministic/probabilistic), variables, and time windows is required. | No data link has been established. | The data of this study (questionnaire, clinical records, ultrasound images) are all naturally linked through a unique patient ID in a single center hospital information system, belonging to deterministic linking. |
|  | 4c | Describe the time period for data collection and follow-up time. | 2.1 Study design: Page 7-8 | Clearly stated the data collection period: September 2022 to December 2023. This study is a cross-sectional analysis without longitudinal follow-up. |
| Participant | 5a | Provide a detailed description of the inclusion and exclusion criteria. | 2.2.1 Inclusion and exclusion criteria: Page8-9 | All standards have been clearly listed. |
|  | 5b | Describe the method of determining the research cohort from the source population/database. | 2.1 Study design: Page 7-8 |  |
| Variable | 6a | Clearly define all outcomes, exposures, predictors, potential confounding factors, and effect modifying factors. | 1. Introduction: Page 3-7  4. Discussion: Page14-20 |  |
|  | 6b | Explain how and why variables are classified or grouped (such as continuous variable reclassification). | 3.Results: Page 11-14  4. Discussion: Page14-20 | Regarding age in the results section. The cumulative number of skin lesions ≥ 3 and BMI ≥ 24 were grouped and compared, and the grouping criteria (clinical significance or median) were provided. |
|  | 6c | If algorithms or derived variables are used, please list the code (such as SQL, SAS) or provide a detailed algorithm description. | Not using algorithm to derive variables. | The variables in this study were directly extracted from raw data (questionnaire scores, ultrasound reports, medical records) without using complex algorithms for derivation. |
| Bias | 7 | Discuss potential sources of bias in data sources and research design. | 5. Limitations: Page 20-21 |  |
| Research scale | 8 | Explain how the research scale is determined. | This study is an exploratory retrospective analysis, without prior sample size calculation, and included all eligible patients during the study period. |  |
| Quantitative variables | 9 | Explain how to handle quantitative variables (such as whether to check linear hypotheses). | 2.4 Statistical analysis: Page 11 |  |
| Statistical analysis | 10 | Describe all statistical methods. | 2.4 Statistical analysis: Page 11 | The software, data presentation method, specific testing methods, and significance level have been explained in detail. |
| Data Access and Cleaning | 11 | Describe data access permissions, cleaning, and verification methods. | 2.1 Study design: Page 7-8  2.3 Ultrasonographic assessment: Page 9-10 | It has been stated that the data comes from our hospital's database and was independently verified by two researchers. Supplementary explanation was provided on the absence of significant missing core data and the processing method. |
| Link | 12 | If data is linked, report the methods and results used to evaluate the quality of the link. | Not applicable |  |
| Ethics and Informed Consent | 13 | Provide detailed information on ethical approval and informed consent (or waiver). | 2.1 Study design: Page 7-8 | We have provided the ethical approval agency and approval number, and declared that we have obtained informed consent from the patient. |
| Result - Participants | 14a | Report the number of participants in each research stage (it is recommended to use a flowchart). | Figure 1 |  |
|  | 14b | Describe the demographic and clinical characteristics of the study population. | 3.1 Demographic and Clinical Characteristics: Page 11-12  Table 1 | Detailed reports have been provided in the results section in both tabular and textual forms. |
| Result - Main outcome | 15 | Report unadjusted and adjusted association estimates (such as OR, HR, RR) and their accuracy (such as 95% CI). | This study mainly reports the P-values of descriptive statistics and inter group differences. The results are shown in Tables and corresponding text. |  |
| Result - Other Analysis | 16 | Any other analysis conducted in the report (such as subgroup analysis, sensitivity analysis). | 3. Results: Page 11-14 | A systematic comparative analysis was conducted on three predefined subgroups, which is the main focus of this study. |
| Discussion - Key Results | 17 | Summarize key results based on assumptions, potential biases, and imprecision. | 5. Limitations: Page 20-21  6. Conclusion: Page 21 |  |
| Discussion - Limitations | 18 | Discuss the limitations of the research and consider the limitations of data sources and links. | 5. Limitations: Page 20-21 |  |
| Discussion - Explanation | 19 | Given the limitations of existing evidence and research, provide a cautious overall explanation. | 4. Discussion: Page 14-20  5. Limitations: Page 20-21  6. Conclusion: Page 21 |  |
| Discussion - Funding | 20 | Provide the funding sources for the current research and the roles of the funders (or declare no funding). | Funding: Page 21-22 |  |
| Other Information - Data Availability | 21 | Explain whether the data supporting the research results is available and how to obtain it. | Data availability statement: Page 22 |  |
| Other Information - Conflict of Interest | 22 | Declare all possible conflicts of interest. | Disclosure: Page 22 |  |
